# Supplementary material
Source: Springer Nature journal article supplement (https://www.springermedizin.de/resource/supplementary/12933_2007_122_MOESM2_ESM.pdf/9539718)

**A**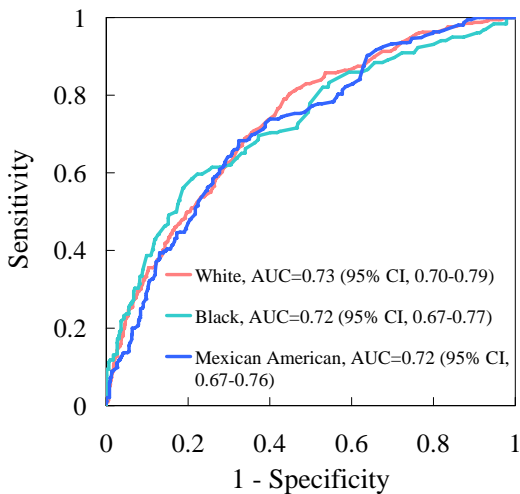**B**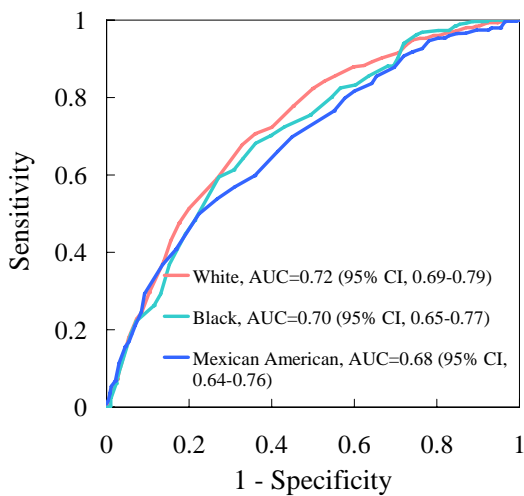**C**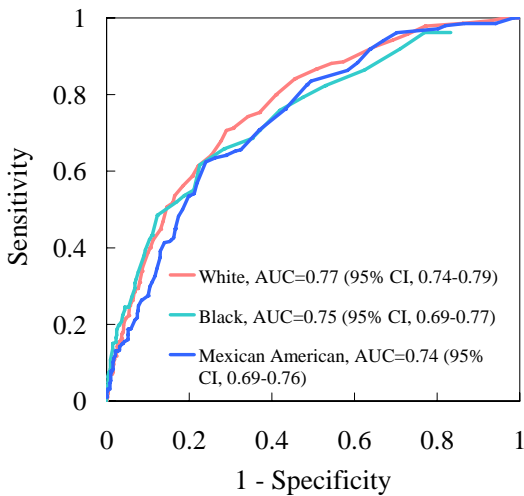

Supplement: MOESM2 [file 9539718]
